# Supplementary material
Source: PubMed Central journal article supplement (PMC7164783)
Supplement: mmc1.pdf [file mmc1.pdf]

## Supplementary webappendix

This webappendix formed part of the original submission and has been peer reviewed. We post it as supplied by the authors.

Supplement to: Haffizulla J, Hartman A, Hoppers M, et al, for the US Nitazoxanide Influenza Clinical Study Group. Effect of nitazoxanide in adults and adolescents with acute uncomplicated influenza: a double-blind, randomised, placebo-controlled, phase 2b/3 trial. *Lancet Infect Dis* 2014; published online May 20. [http://dx.doi.org/10.1016/S1473-3099\(14\)70717-0](http://dx.doi.org/10.1016/S1473-3099(14)70717-0).

## Appendix 1.

### US Nitazoxanide Influenza Clinical Study Group:

Gregory Adams, MD, Glasgow Family Practice Newark, DE; Kevin Adkins, MD, NCA Medical Center, Mountain Home, AR; Patricia Alvarez, MD, Latin American Research, Santo Domingo, DR; Saadat Ansari, MD, Private Practice, Huntsville, AL; Allan Aven, MD, Quality of Life Medical & Research Center, Tucson, AZ; Matthew Beacom, MD, Prairie Fields Family Medicine, Fremont, NE; K. Alan Bean, MD, CTL Research, Eagle, ID; Richard Beasley, MD, Health Concepts, Rapid City, SD; Michael Bennett, MD, Medical Associates Research Group, San Diego, CA; Loray Blair-Britt, MD, Century Clinical Research, Daytona Beach, FL; Edward Braun, MD, Midtown Medical Center, Tampa, FL; John Calcagno, MD, Cy3rgy Research, Gresham, OR; Venkata Challa, MD, Peters Medical Research, High Point, NC; Steve Choi, MD, Hometown Urgent Care and Research Dayton, OH; Rita Chuang, MD, Clinical Research Advantage, Inc., Henderson, NV; Patrick Clay, PharmD, Dybedal Center for Clinical Research, Kansas City, MO; Diane Combs, MD, Albuquerque Neruoscience Inc, Albuquerque, NM; MichaelCrawley, MD, NEA Baptist Clinic, Jonesboro, AR; Mitchell Efros, MD, AccuMed Research Associates, Garden City, NY; Bryan Feldman, MD, Parsons Avenue Medical Clinic, Columbus, OH; Thomas Fiel, MD, Fiel Family and Sports Medicine, Tempe, AZ; Gene Fuller, MD, Wasatch Clinical Research, Salt Lake City, UT; Gary Gleason, MD, Premier Clinical Research, Spokane, WA; William Gonte, MD, American Center for Clinical Trials, Southfield, MI; Piyush Gupta, MD, Hometown Urgent Care and Research, Groveport, OH; Jason Haffizulla, MD, Sunrise Medical Center, Lauderdale Lakes, FL; Wayne Harper, MD, Wake Research Associates, Raleigh, NC; Hoadley Harris, MD, Plains Medical Clinic/Odyssey Research, Fargo, ND; Aaron Hartman, MD, Virginia Research Center, Richmond, VA; Delphanie Head, MD, PMI Health Research Group, Atlanta, GA; Archie Hearne, MD, Preferred Research Partners, Inc., Little Rock, AR; J. Dwayne Helms, MD, Horizon Research Group, LLC., Sulphur, LA; Martin Hollingsworth, MD, Copperview Medical Center, South Jordan, UT; Melanie Hoppers, MD, HCCA - Clinical Research Solutions, Jackson, TN; Patricia Houser, MD, Amherst Family Practice, Winchester, VA; Sergio Ibarra, MD, Southwest Urgent Care, El Paso, TX; William Jonakin, MD, Sonora Clinical Research, Boise, ID; Grantley Joseph, MD, DeKalb Medical Physicians at Flat Shoals, Decatur, GA; Kishor Joshi, MD, Private Practice, Uniontown, PA; Jennifer Kay, MD, Ridge Family Practice, PC/Clinical Research Advantage, Inc., Council Bluffs, IA; Louise Lamarre, MD, Vital Clinical Research, Desoto, TX; John Mageli, MD, Aspen Medical Group, Saint Paul, MN; Acisclo Marxuach-Cuetera, MD, Fundación de Investigación de Diego, San Juan, PR; Edward McCarthy, MD, Family Medicine of Sayebrook, Myrtle Beach, SC; Derek Muse, MD, Highland Clinical Research, Salt Lake City, UT; Robert Onder, MD, Midwest Clinical Research, LLC., St. Louis, MO; April Palmer, MD, Regional Research Specialists, LLC, Shreveport, LA; Dipti Patel, MD, Om Medical, Henderson, NV; Frank Perrone, MD, Jeffrey A. Lindenbaum, D.O., P.C., Yardley, PA; Norval Rasmussen, MD, Private Practice, Morgantown, WV; Keith Reisinger, MD, Primary Physicians Research, Jefferson Hills, PA; Harvey Resnick, MD, R/D Clinical Research, Lake Jackson, TX; Karin Rock, MD, Greystone Medical Research, Birmingham, AL; Luis Ruiz-Rivera, MD, Endocrine Lipid Diabetes Research Ctr., Ponce, PR; Gary Ruoff, MD, Westside Family Medical Center, Kalamazoo, MI; S. Steve Samudrala, MD, HCCA - Clinical Research Solutions, Franklin, TN; Robert Saniuk, MD, Bellevue Family Practice/Clinical Research Advantage, Inc., Bellevue, NE; Darcy Scheeler, MD, Clinical Trials of the Rockies, Denver, CO; Shaukat Shah, MD, St. Joseph's Medical Associates, Stockton, CA; Gerald Shockey, MD, Desert Clinical Research, LLC, Mesa, AZ; Dimitri Sirakoff, MD, Trinity Clinical Trials, Santa Ana, CA; Christopher Smith, MD, Health Sciences Research Center at Asthma and Allergy Associates, P.C.,

Elmira, NY; Jeffrey Smith, MD, Odyssey Research, Bismarck, ND; John Speer, MD, Colorado Springs Health Partners - East/Clinical Research Advantage, Inc., Colorado Springs, CO; Jack Stapleton, MD, University of Iowa, Iowa City, IA; Jeffrey Stewart, MD, Family Medicine Associates of Texas, Carrollton, TX; Charles Tessier, MD, Horizon Research Group, LLC, Baton Rouge, LA; Vincent Thompson, MD, Libra Clinical Research Associates, Brick, NJ; Mario Torres, MD, A+ Research, Inc., Miami, FL; Jan Vlach, MD, Medical Research Associates, Traverse City, MI; Noel Williams, MD, OCRI, LLC, Oklahoma City, OK; Gary Yeoman, MD, Founders Research Corporation, Philadelphia, PA
